# Supplementary material
Source: PubMed Central journal article supplement (PMC4468681)
Supplement: AAC.00100-15_zac007154152so1.pdf [file AAC.00100-15_zac007154152so1.pdf]

**Supplementary Table 1: *csp1*-types of strains derived from clinical samples in Germany**

| isolate name  | region | origin     | year of isolation | Cyp51A isoform                      | <i>csp1</i> type | underlying disease | reference   |
|---------------|--------|------------|-------------------|-------------------------------------|------------------|--------------------|-------------|
| cl0273        | V      | Augsburg   | 2012              | wt                                  | t01              |                    | (1)         |
| cl0031        | V      | Tubingen   | 2011              | wt                                  | t01              | CF                 | (1)         |
| cl0034-1      | V      | Tubingen   | 2011              | wt                                  | t02              |                    | (1)         |
| cl0243        | III    | Koblenz    | 2012              | wt                                  | t03              |                    | (1)         |
| cl0231        | V      | Freiburg   | 2012              | wt                                  | t03              |                    | (1)         |
| cl0279        | V      | Munich     | 2011              | wt                                  | t03              | CF                 | (1)         |
| cl0248        | V      | Tubingen   | 2012              | wt                                  | t03              | CF                 | (1)         |
| cl0158        | II     | Hannover   | 2011              | wt                                  | t06B             |                    | (1)         |
| 1966 (Pat2)   | III    | Essen      | 2012              | wt                                  | t08              | HSCT               | (2)         |
| cl0237        | II     | Hannover   | 2012              | G54W                                | t01              |                    | (1)         |
| 1976 (Pat3)   | III    | Essen      | 2012              | TR <sub>34</sub> /L98H              | t01              | HSCT               | (2)         |
| cl0251        | V      | Munich     | 2011              | TR <sub>34</sub> /L98H              | t02              | CF                 | (1)         |
| cl0270        | V      | Munich     | 2011              | TR <sub>34</sub> /L98H              | t02              | CF                 | (1)         |
| cl0281        | V      | Munich     | 2011              | TR <sub>34</sub> /L98H              | t02              | CF                 | (1)         |
| M0403         | III    | Cologne    | 2012              | TR <sub>34</sub> /L98H              | t04A             | CF                 | (3)         |
| A4813         | III    | Cologne    | 2012              | TR <sub>34</sub> /L98H              | t04B             | leukemia           | (4)         |
| M0057         | III    | Cologne    | 2013              | TR <sub>34</sub> /L98H              | t04B             | CF                 | (3)         |
| M0850         | III    | Cologne    | 2012              | TR <sub>34</sub> /L98H              | t04B             | CF                 | (3)         |
| M1030         | III    | Cologne    | 2011              | TR <sub>34</sub> /L98H              | t04B             | CF                 | (3)         |
| cl0168        | III    | Düsseldorf | 2011              | TR <sub>34</sub> /L98H              | t04B             |                    | (1)         |
| 1962 (Pat1)   | III    | Essen      | 2012              | TR <sub>34</sub> /L98H              | t04B             | HSCT               | (2)         |
| 1978 (Pat4)   | III    | Essen      | 2012              | TR <sub>34</sub> /L98H              | t04B             | HSCT               | (2)         |
| 2087 (Pat5)   | III    | Essen      | 2013              | TR <sub>34</sub> /L98H              | t04B             | HSCT               | (2)         |
| 2091 (Pat6)   | III    | Essen      | 2013              | TR <sub>34</sub> /L98H              | t04B             | HSCT               | (2)         |
| 1899          | III    | Essen      | 2012              | TR <sub>34</sub> /L98H              | t04B             | aspergilloma       | (2, 5)      |
| cl0164        | I      | Hamburg    | 2011              | TR <sub>34</sub> /L98H              | t11              |                    | (1)         |
| cl0267        | III    | Wurzburg   | 2011              | TR <sub>34</sub> /L98H              | t11              |                    | (1)         |
| A12519 (Pat8) | III    | Cologne    | 2012              | TR <sub>46</sub> /Y121F/T289A       | t01              | HSCT               | (2)         |
| M0728         | III    | Cologne    | 2012              | TR <sub>46</sub> /Y121F/T289A       | t01              | CF                 | (3)         |
| 2107 (Pat7)   | III    | Essen      | 2013              | TR <sub>46</sub> /Y121F/T289A       | t02              | HSCT               | (2)         |
| cl0558        | III    | Dresden    | 2014              | TR <sub>46</sub> /Y121F/M172I/T289A | t01              | leukemia           | unpublished |
| cl0170        | V      | Tubingen   | 2011              | F219C                               | t01              | CF                 | (1)         |
| cl0262        | V      | Munich     | 2011              | M220I                               | t01              |                    | (1)         |
| M0491         | III    | Cologne    | 2010              | M220L                               | t03              |                    | (3)         |

HSCT: recipient of human stem cell transplant; CF: cystic fibrosis

## References

1. **Bader O, Weig M, Reichard U, Lugert R, Kuhns M, Christner M, Held J, Peter S, Schumacher U, Buchheidt D, Tintelnot K, Gross U.** 2013. *cyp51A*-Based mechanisms of *Aspergillus fumigatus* azole drug resistance present in clinical samples from Germany. *Antimicrob Agents Chemother* **57**:3513-3517.
2. **Steinmann J, Hamprecht A, Vehreschild MJ, Cornely OA, Buchheidt D, Spiess B, Koldehoff M, Buer J, Meis JF, Rath PM.** 2015. Emergence of azole-resistant invasive aspergillosis in HSCT recipients in Germany. *The Journal of antimicrobial chemotherapy*.
3. **Fischer J, van Koningsbruggen-Rietschel S, Rietschel E, Vehreschild MJ, Wisplinghoff H, Kronke M, Hamprecht A.** 2014. Prevalence and molecular characterization of azole resistance in *Aspergillus* spp. isolates from German cystic fibrosis patients. *The Journal of antimicrobial chemotherapy* **69**:1533-1536.
4. **Hamprecht A, Buchheidt D, Vehreschild JJ, Cornely OA, Spiess B, Plum G, Halbsguth TV, Kutsch N, Stippel D, Kahl P, Persigehl T, Steinbach A, Bos B, Hallek M, Vehreschild MJ.** 2012. Azole-resistant invasive aspergillosis in a patient with acute myeloid leukaemia in Germany. *Euro Surveill* **17**:20262.
5. **Rath PM, Buchheidt D, Spiess B, Arfanis E, Buer J, Steinmann J.** 2012. First reported case of azole-resistant *Aspergillus fumigatus* due to the TR/L98H mutation in Germany. *Antimicrob Agents Chemother* **56**:6060-6061.

**Supplementary Table 2: prevalence of resistant isolates by study region.**

| study region | total samples |     | TR <sub>34</sub> <sup>a</sup> |    | TR <sub>46</sub> <sup>a</sup> |   | other         |                | wt |   | all |       | TR <sub>34</sub> and TR <sub>46</sub> only <sup>a</sup> |      |
|--------------|---------------|-----|-------------------------------|----|-------------------------------|---|---------------|----------------|----|---|-----|-------|---------------------------------------------------------|------|
|              | E             | C   | E                             | C  | E                             | C | E             | C              | E  | C | E   | C     | E                                                       | C    |
| I            | 16            | 129 | 1                             | 1  | -                             | - | G54A          | -              | -  | - | 2   | (13%) | 1                                                       | (1%) |
| II           | 86            | 33  | 4                             | -  | 1                             | - | -             | G54E           | -  | 1 | 5   | (6%)  | 2                                                       | (6%) |
| III          | 283           | 296 | 36                            | 10 | 5                             | 3 | G54A<br>M220I | M220L          | -  | 2 | 44  | (16%) | 15                                                      | (5%) |
| IV           | 44            | 56  | 3                             | 1  | -                             | - | -             | -              | 1  | - | 4   | (9%)  | 1                                                       | (2%) |
| V            | 23            | 262 | 1                             | 3  | -                             | - | -             | M220I<br>F219C | -  | 6 | 1   | (4%)  | 11                                                      | (4%) |
| total        | 452           | 776 | 46                            | 15 | 6                             | 3 | 3             | 4              | 1  | 9 | 56  | (12%) | 30                                                      | (4%) |

E: environmental strains (this study); C: clinical strains (cumulative from references (1-5))<sup>a</sup>: TR<sub>34</sub> refers to

TR<sub>34</sub>/L98H, TR<sub>46</sub> to both TR<sub>46</sub>/Y121F/T289A and TR<sub>46</sub>/Y121F/M172I/T289A

## References

1. **Rath PM, Buchheidt D, Spiess B, Arfanis E, Buer J, Steinmann J.** 2012. First reported case of azole-resistant *Aspergillus fumigatus* due to the TR/L98H mutation in Germany. *Antimicrob Agents Chemother* **56**:6060-6061.
2. **Hamprecht A, Buchheidt D, Vehreschild JJ, Cornely OA, Spiess B, Plum G, Halbsguth TV, Kutsch N, Stippel D, Kahl P, Persigehl T, Steinbach A, Bos B, Hallek M, Vehreschild MJ.** 2012. Azole-resistant invasive aspergillosis in a patient with acute myeloid leukaemia in Germany. *Euro Surveill* **17**:20262.
3. **Bader O, Weig M, Reichard U, Lugert R, Kuhns M, Christner M, Held J, Peter S, Schumacher U, Buchheidt D, Tintelnot K, Gross U.** 2013. *cyp51A*-Based mechanisms of *Aspergillus fumigatus* azole drug resistance present in clinical samples from Germany. *Antimicrob Agents Chemother* **57**:3513-3517.
4. **Fischer J, van Koningsbruggen-Rietschel S, Rietschel E, Vehreschild MJ, Wisplinghoff H, Kronke M, Hamprecht A.** 2014. Prevalence and molecular characterization of azole resistance in *Aspergillus* spp. isolates from German cystic fibrosis patients. *The Journal of antimicrobial chemotherapy* **69**:1533-1536.
5. **Steinmann J, Hamprecht A, Vehreschild MJ, Cornely OA, Buchheidt D, Spiess B, Koldehoff M, Buer J, Meis JF, Rath PM.** 2015. Emergence of azole-resistant invasive aspergillosis in HSCT recipients in Germany. *The Journal of antimicrobial chemotherapy*.

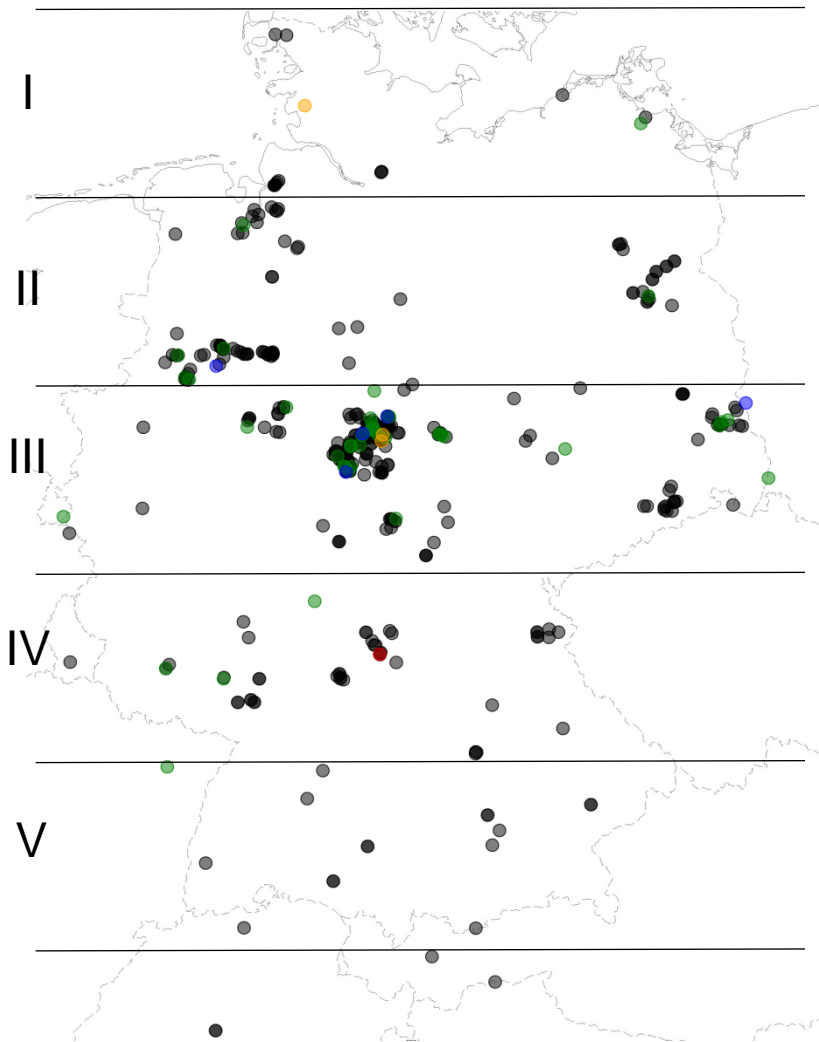

**Figure S1: Geographical origin of environmental samples.** Grey to black scaled dots: cumulative negative samples; colored circles: isolates with reduced drug susceptibilities color-coded for *cyp51A*-allele (green, TR<sub>34</sub>/L98H; blue, TR<sub>46</sub>/Y121F/T289A; orange, other; red, wt allele). Zones I-V are divided along latitudes of 53.5°N, 52°N, 50.5°N, and 49°N.
